# Supplementary material
Source: PubMed Central journal article supplement (PMC8270393)
Supplement: NIHMS1703965-supplement-sm.pdf [file NIHMS1703965-supplement-sm.pdf]

**A****Normal state**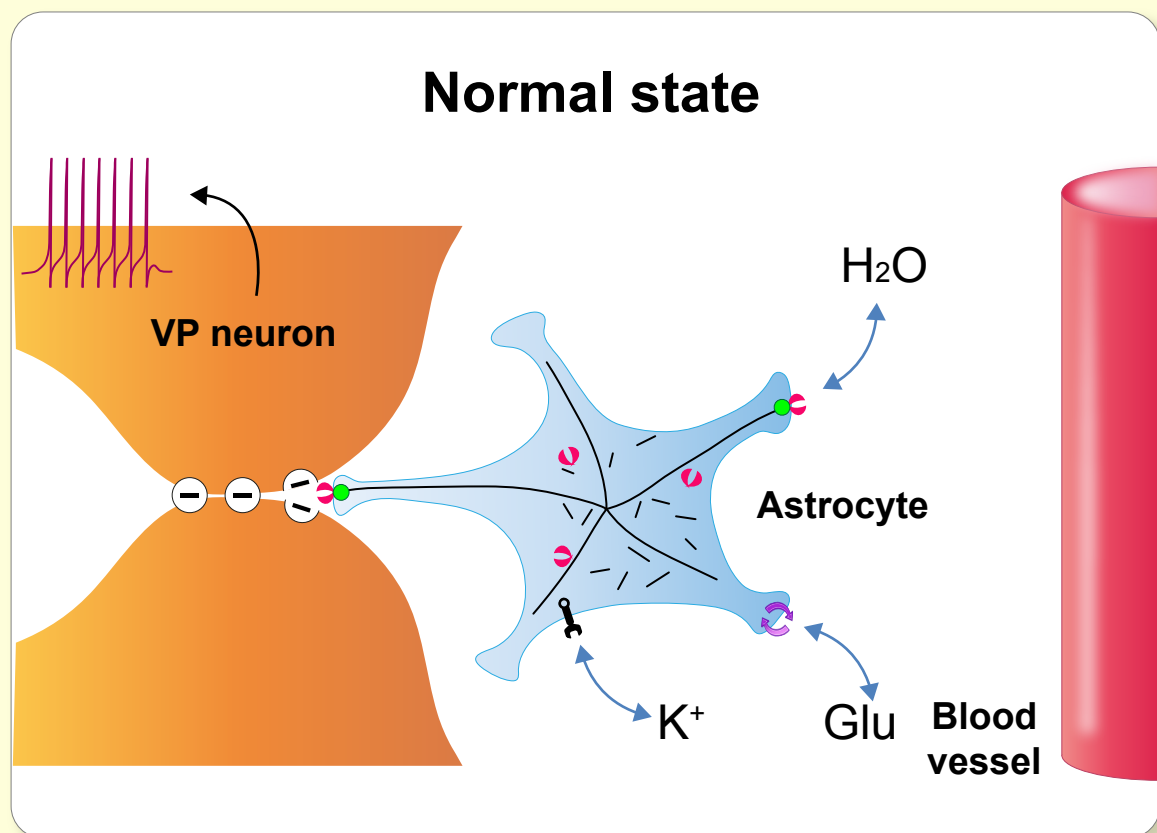**B****HOC early stage**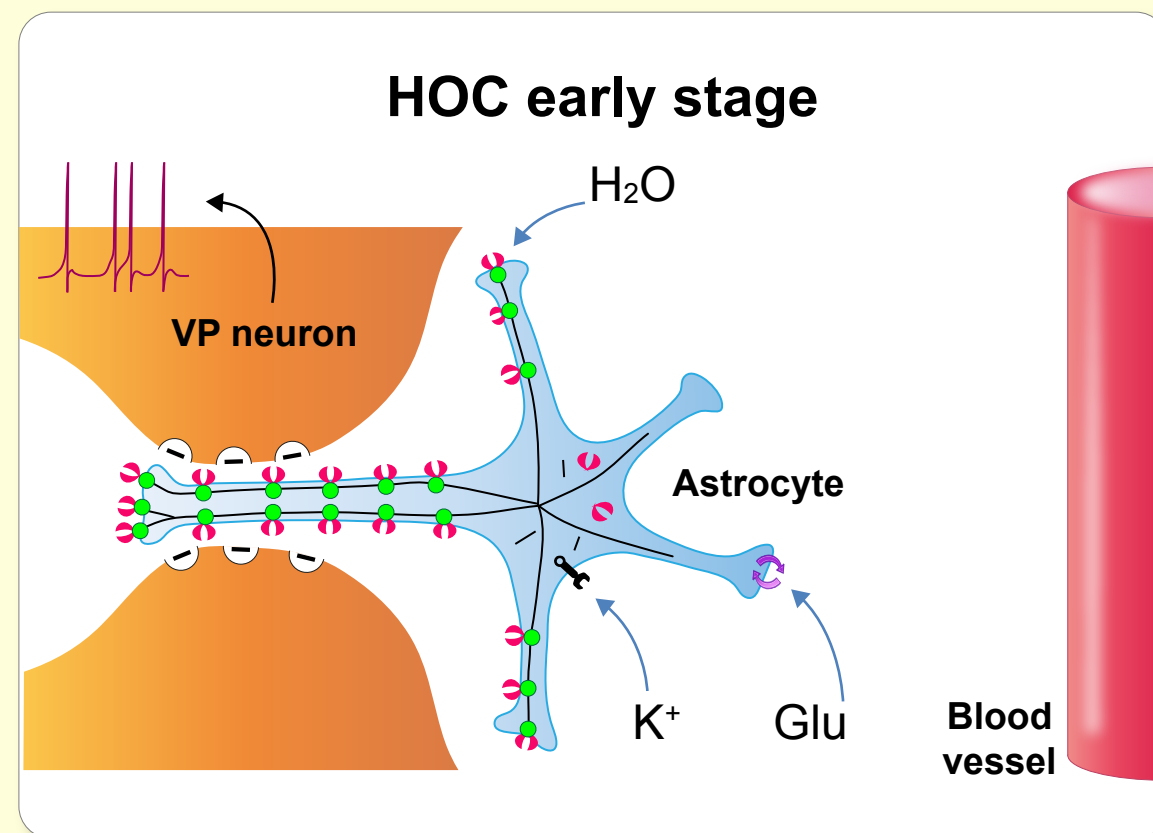**C****HOC late stage**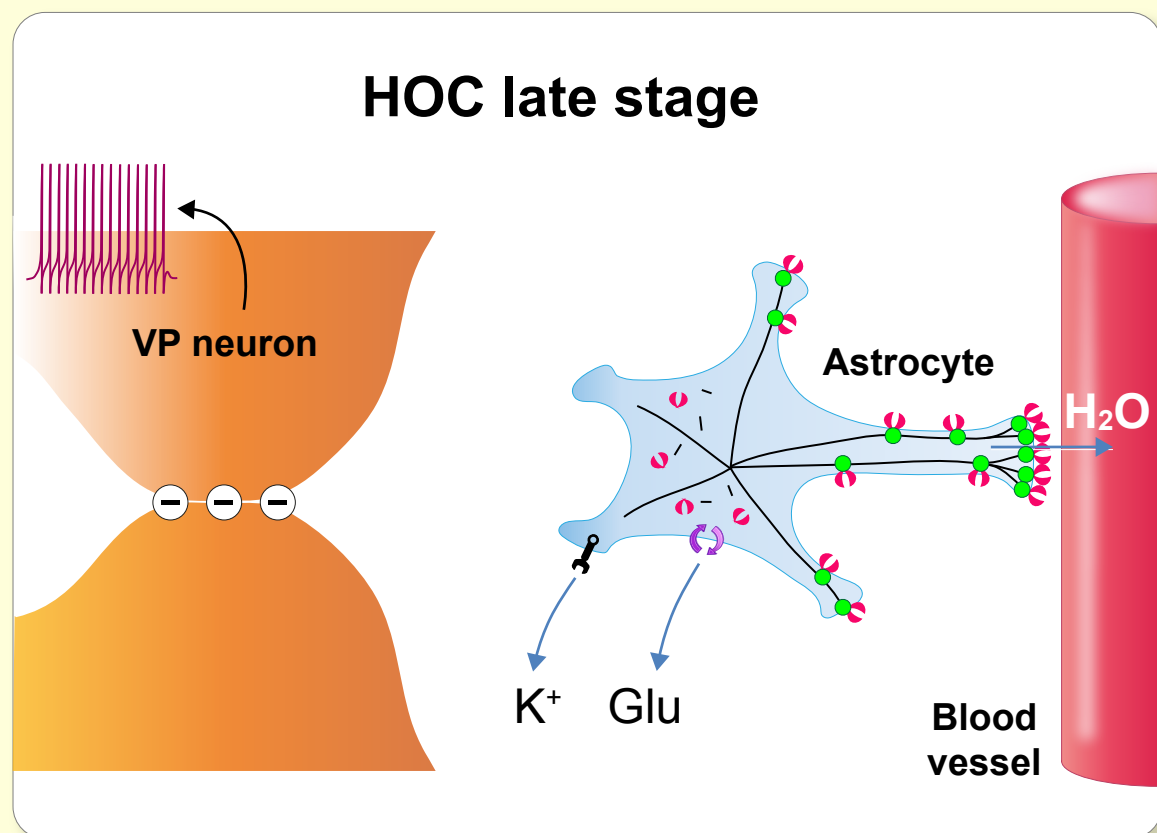**D****HOC early/late stage after blocking AQP4**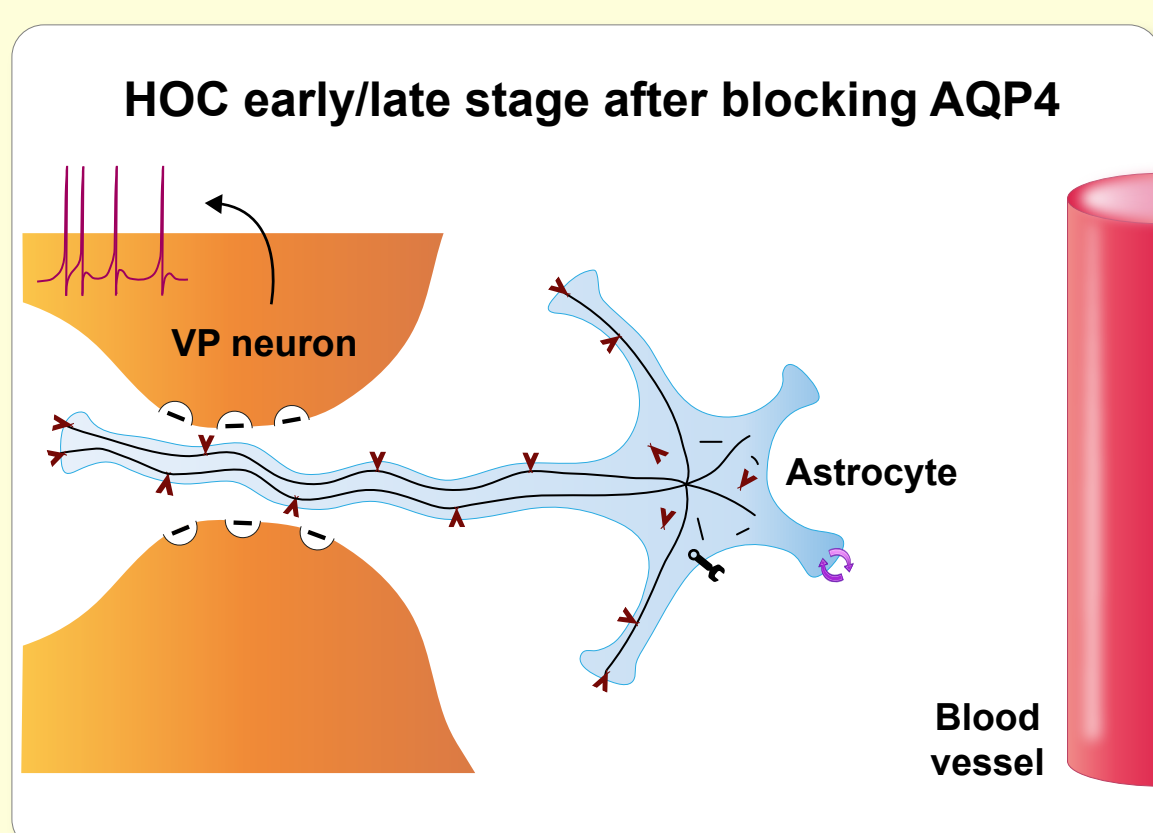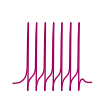Electrical activity of  
VP neuron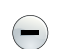

Gap junction

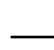

GFAP

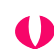

AQP4

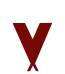AQP4 blocking by  
TGN-020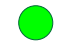Binding site of GFAP  
and AQP4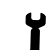

Potassium channel

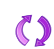

Glutamate transporter
